# Supplementary material
Source: PubMed Central journal article supplement (PMC551483)
Supplement: mbc_E04-09-0765_1.pdf [file mbc_E04-09-0765_1.pdf]

Winey *et al.*, Supplemental Figure A

Spindle Name:

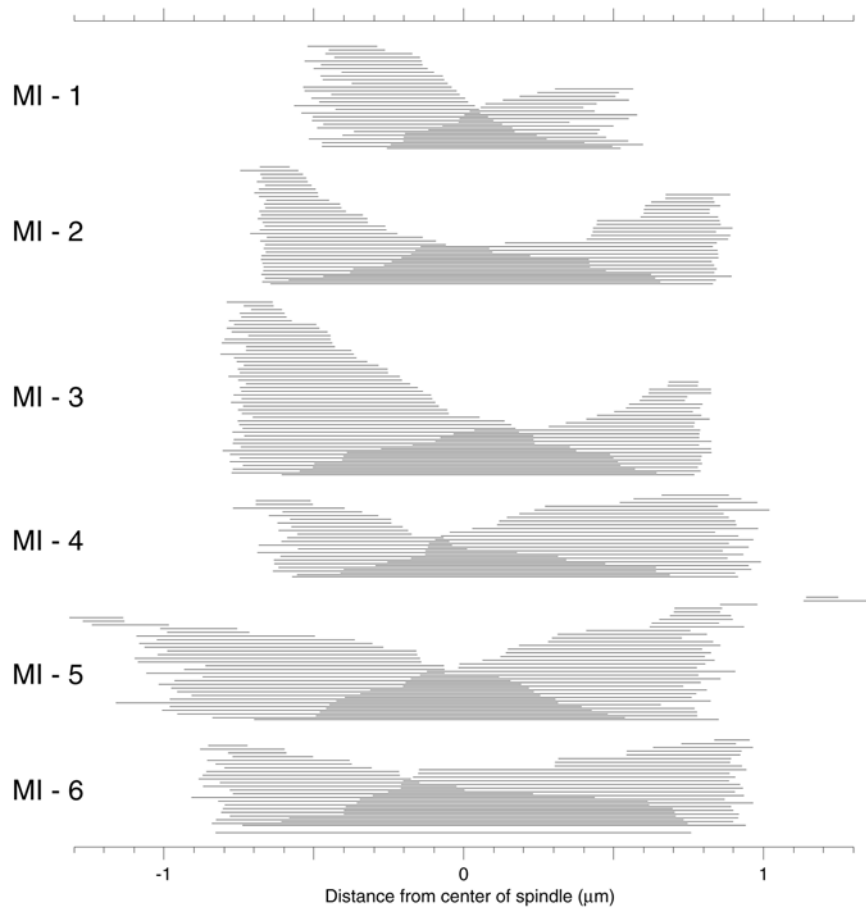

Spindle Name:

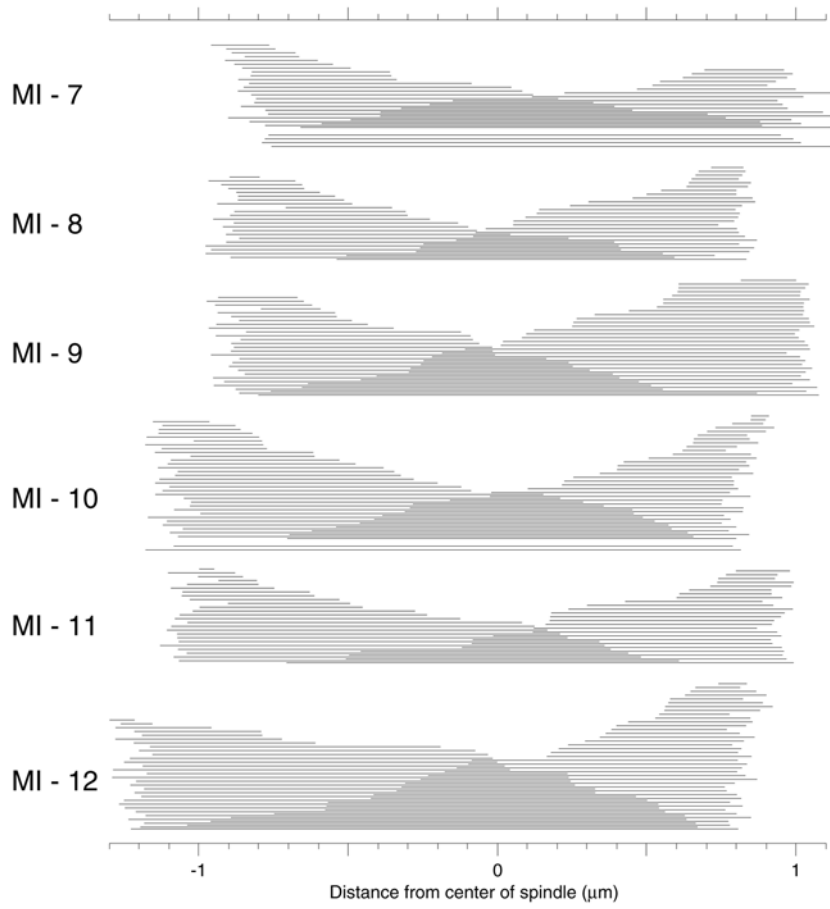

Spindle Name:

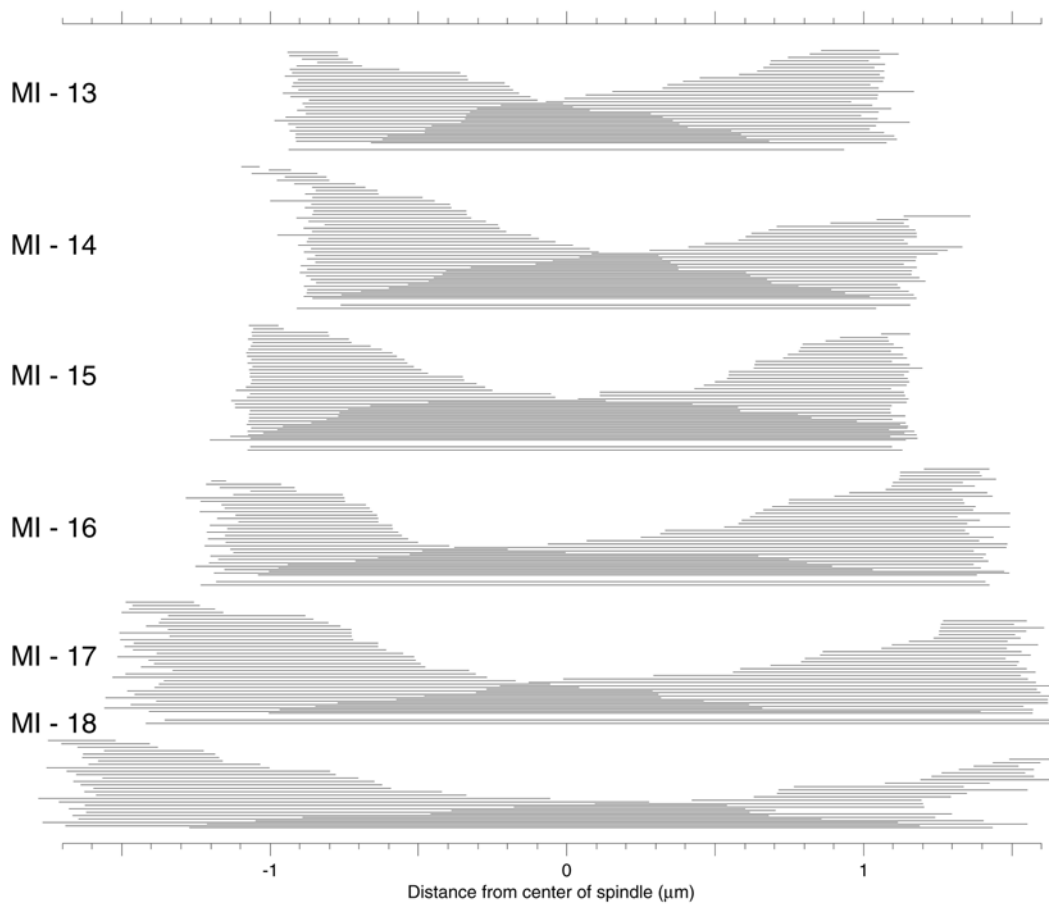

Winey *et al.*, Supplemental Figure D

Spindle Name:

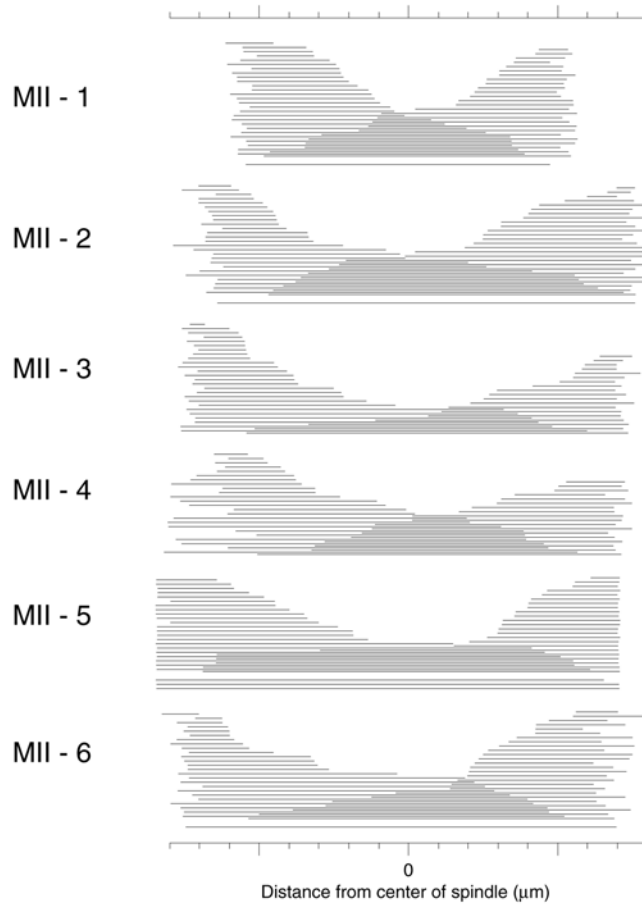

Spindle Name:

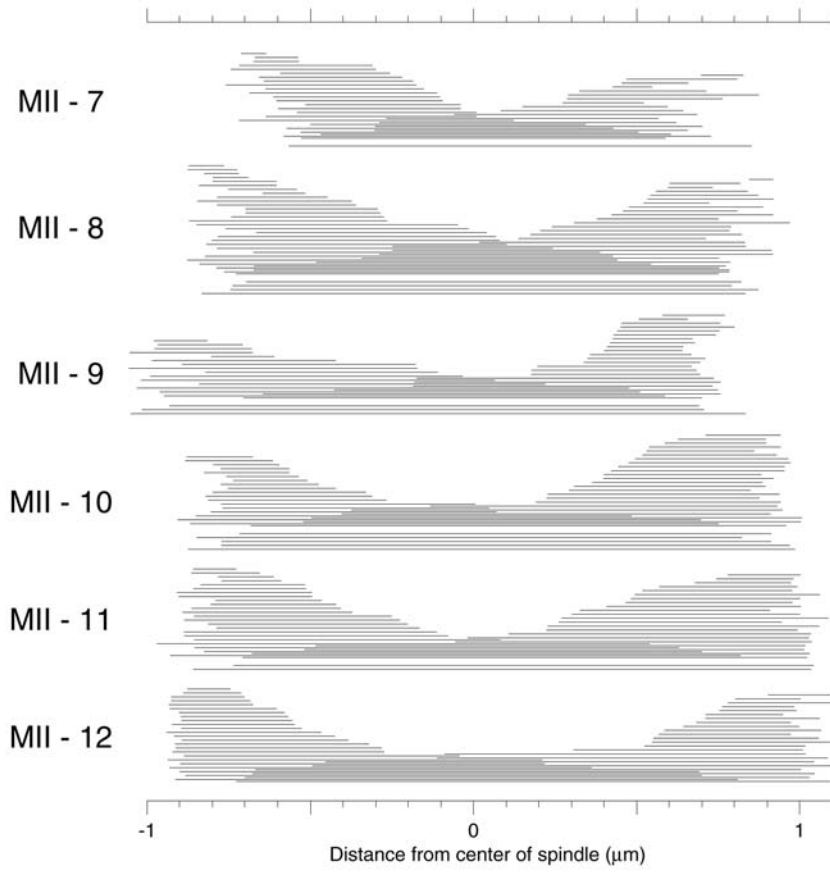

Spindle Name:

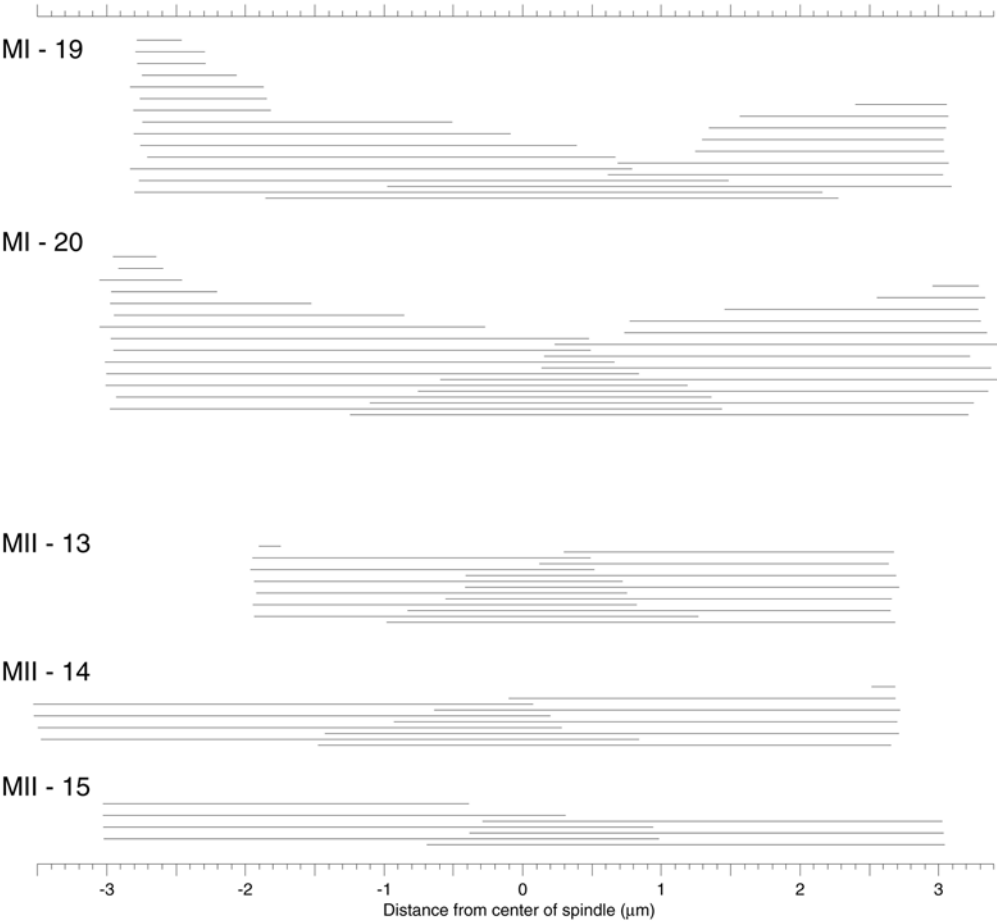

**Supplemental Figure A** – Microtubule overlap graphs of showing the number and length of microtubules from each SPB as shown in Figure 4E in the text. This figure is the microtubule overlap graphs of MI spindles 1 to 6 (see Table 1).

**Supplemental Figure B** – Microtubule overlap graphs of MI spindles 7 to 12 (see Table 1).

**Supplemental Figure C** – Microtubule overlap graphs of MI spindles 13 to 18 (see Table 1).

**Supplemental Figure D** – Microtubule overlap graphs of MII spindles 1 to 6 (see Table 1).

**Supplemental Figure E** – Microtubule overlap graphs of MII spindles 7 to 12 (see Table 1).

**Supplemental Figure F** – Microtubule overlap graphs of the longest spindles, MI spindles 19 and 20, and MII spindles 13 to 15 (see Table 1).
